# On the genetic architecture of rapidly adapting and convergent life history traits in guppies

## Author list:

James R Whiting<sup>1</sup>, Josephine R Paris<sup>1</sup>, Paul J Parsons<sup>1,2</sup>, Sophie Matthews<sup>1</sup>, Yuridia Reynoso<sup>4</sup>, Kimberly A. Hughes<sup>3</sup>, David Reznick<sup>4</sup>, Bonnie A Fraser<sup>1</sup>

## Author Affiliations:

- 1) Department of Biosciences, University of Exeter, Stocker Road, Exeter EX4 4QD, UK
- 2) Department of Animal and Plant Sciences, University of Sheffield, Alfred Denny Building, University of Sheffield, Western Bank, Sheffield S10 2TN, UK
- 3) Department of Biological Science, Florida State University, Tallahassee, Florida, 32303, USA
- 4) Department of Biology, University of California Riverside, Riverside, California, 92521, USA

## Corresponding Author:

James R Whiting: [jwhiting2315@gmail.com](mailto:jwhiting2315@gmail.com)

## Keywords:

Guppy, Quantitative Genetics, Life History Traits, Rapid Adaptation, Convergent Evolution, Parallel Evolution, QTL.

## Genetic architecture of guppy life history

---

### 1 **ABSTRACT**

2 The genetic basis of traits can shape and constrain how adaptation proceeds in nature; rapid  
3 adaptation can be facilitated by polygenic traits, whereas polygenic traits may restrict re-use  
4 of the same genes in adaptation (genetic convergence). The rapidly evolving life histories of  
5 guppies in response to predation risk provide an opportunity to test this proposition.  
6 Guppies adapted to high- (HP) and low-predation (LP) environments in northern Trinidad  
7 evolve rapidly and convergently among natural populations. This system has been studied  
8 extensively at the phenotypic level, but little is known about the underlying genetic  
9 architecture. Here, we use an F2 QTL design to examine the genetic basis of seven (five  
10 female, two male) guppy life history phenotypes. We use RAD-sequencing data (16,539  
11 SNPs) from 370 male and 267 female F2 individuals. We perform linkage mapping, estimates  
12 of genome-wide and per-chromosome heritability (multi-locus associations), and QTL  
13 mapping (single-locus associations). Our results are consistent with architectures of many-  
14 loci of small effect for male age and size at maturity and female interbrood period. Male  
15 trait associations are clustered on specific chromosomes, but female interbrood period  
16 exhibits a weak genome-wide signal suggesting a potentially highly polygenic component.  
17 Offspring weight and female size at maturity are also associated with a single significant QTL  
18 each. These results suggest rapid phenotypic evolution of guppies may be facilitated by  
19 polygenic trait architectures, but these may restrict gene-reuse across populations, in  
20 agreement with an absence of strong signatures of genetic convergence from recent  
21 population genomic analyses of wild HP-LP guppies.

22

## Genetic architecture of guppy life history

---

### 23 INTRODUCTION

24 Recent evidence that phenotypes can evolve rapidly and often with surprising repeatability  
25 (convergence) has led to a re-evaluation of our expectations surrounding adaptation in  
26 nature. Particularly, understanding the genetic architecture of traits associated with both  
27 rapid adaptation and convergence can allow for insights into how adaptive variation may be  
28 maintained and be made available to respond to sudden changes in selection. Such research  
29 is important not only due to the current global circumstances of rapid environmental  
30 change, but also to understand adaptation more generally. Quantitative traits can have  
31 architectures made up of many loci of small effect (polygenic), single loci of large effect  
32 (monogenic), or an intermediate of these (oligogenic). There are currently theoretical  
33 expectations surrounding which of these are most likely to underlie rapidly adapting  
34 (Pritchard *et al.*, 2010; Jain and Stephan, 2017b) and/or convergent phenotypes (Yeaman *et*  
35 *al.*, 2018) but empirical evidence is only starting to accumulate.

36  
37 Polygenic traits may facilitate rapid adaptation by providing a substrate of standing genetic  
38 variation to be exploited (Jain and Stephan, 2015, 2017a; Barghi *et al.*, 2019), enabling  
39 populations to adapt to shifting fitness optima by many small changes (Jain and Stephan,  
40 2017b). Indeed, Fisher's fundamental theorem states that the rate change of mean fitness is  
41 equal to the amount of additive genetic variance for fitness (Fisher, 1930). Conversely, rapid  
42 adaptation of oligogenic traits is expected to occur through selective sweeps, which can  
43 result in less precise shifts across the fitness landscape or 'overshooting' incurring genetic  
44 load (Buffalo and Coop, 2019). On the basis of this cost, it is expected that most rapid  
45 adaptation of modest changes to trait means should occur using many loci of small effect,  
46 with the exception of instances in which sudden environmental change is so extreme as to

## Genetic architecture of guppy life history

---

47 be lethal and affect absolute fitness (Bell, 2013; Whitehead *et al.*, 2017). Recent examples of  
48 suspected polygenic bases involved in rapid adaptation include shell morphologies of  
49 *Littorina* periwinkles (Westram *et al.*, 2018), immunity phenotypes in response to  
50 myxomatosis in rabbits (Alves *et al.*, 2019), and killifish adapting to anthropogenic thermal  
51 effluent runoff (Dayan *et al.*, 2019).

52

53 Similarly, there are expectations regarding the interactions between genetic architecture  
54 and convergent evolution. Whilst convergent phenotypes can arise through non-convergent  
55 genetic routes, the likelihood of convergent phenotypes having convergent genetics is  
56 expected to vary according to trait architecture. For example, polygenic traits reduce the  
57 likelihood of evolution of the same genes by increasing redundancy in the mapping of  
58 genotype to phenotype (Yeaman *et al.*, 2018; Barghi *et al.*, 2020; Láruson *et al.*, 2020). In  
59 contrast, if genetic architectures are simple and composed of few large effect loci, reduced  
60 redundancy can funnel adaptation through repeatable genetic paths. Many of the most  
61 notable examples of genetic convergence are single loci of large effect (Stern, 2013),  
62 including the *eda* gene associated with marine-freshwater armour plate phenotypes in  
63 three-spined stickleback (Colosimo, 2005), and the *optix* gene associated with wing  
64 patterning across *Heliconius* species (Reed *et al.*, 2011).

65

66 The guppies of northern Trinidad are a model system for studying phenotypic adaptation,  
67 which has provided empirical evidence for both rapid adaptation and convergent evolution.  
68 In this system, barrier waterfalls within many rivers have created replicated  
69 downstream/high-predation (HP) and upstream/low-predation (LP) habitats. Each river  
70 contains HP- and LP-adapted guppy populations that have independently evolved

## Genetic architecture of guppy life history

---

71 convergent LP phenotypes in predator-free upstream environments. LP populations are  
72 typically longer-lived, exhibiting larger adult sizes, reduced brood size, longer time to reach  
73 maturity and longer interbrood period than their HP counterparts (Reznick, 1982; Reznick *et*  
74 *al.*, 2001; Torres Dowdall *et al.*, 2012). Experimental translocations of HP guppies to  
75 previously uncolonised LP environments further demonstrated that LP life history  
76 phenotypes evolve rapidly (Endler, 1980; Reznick and Bryga, 1987; Reznick *et al.*, 1990,  
77 1997, 2019; Gordon *et al.*, 2009). Guppies raised under laboratory conditions for multiple  
78 generations continue to exhibit differences between HP and LP phenotypes, indicating these  
79 traits have a heritable genetic basis (Reznick, 1982; Torres Dowdall *et al.*, 2012). Beyond this  
80 however, and despite the wealth of knowledge regarding life history evolution in these  
81 populations, little is known about the genetic architecture of these traits.

82

83 Life history traits are typically quantitative and are commonly involved in adaptation to  
84 novel or changing environments. Previous studies exploring the genetic basis of life history  
85 traits have documented everything from highly polygenic traits, such as clutch size and egg  
86 mass in great tits (Santure *et al.*, 2013) and weight of Soay sheep (Bérénos *et al.*, 2015), to  
87 traits with single loci explaining a large proportion of phenotypic variance, such as age at  
88 maturity in atlantic salmon (*Salmo salar* L) (Ayllon *et al.*, 2015; Barson *et al.*, 2015) and other  
89 salmonids (Moghadam *et al.*, 2007; Kodama *et al.*, 2018). Life history traits can often exhibit  
90 genetic covariance, with different traits sharing aspects of their genetic architecture, which  
91 can have important implications for pleiotropic constraint during adaptation (Hall *et al.*,  
92 2006).

93

## Genetic architecture of guppy life history

---

94 There are various avenues for exploring the genetic architecture of quantitative traits. For  
95 example, single locus quantitative trait locus (QTL) analyses or Genome-Wide Association  
96 Studies (GWAS) are now commonplace. However, these approaches can inflate the  
97 prominence of single loci and their inherent bias against multi-locus models has come under  
98 scrutiny (Rockman, 2012; Slate, 2013). Indeed, multi-locus analyses have resolved some  
99 empirical inconsistencies, such as the “missing heritability crisis” (Manolio *et al.*, 2009),  
100 subsequently returning much higher estimates of heritability compared with the sum of  
101 single-locus outliers for classic quantitative traits such as human height (Yang *et al.*, 2010;  
102 Yang, Manolio, *et al.*, 2011). Extensions of these multi-locus approaches have partitioned  
103 phenotypic variance into specific chromosomes, with correlations between chromosome  
104 size (as a proxy for number of functional loci) and partitioned phenotypic variance taken as  
105 evidence for highly polygenic traits (Santure *et al.*, 2013; Béréanos *et al.*, 2015; Kemppainen  
106 and Husby, 2018a). The rising prominence of multi-locus models has started to bring  
107 empirical evidence back in line with Fisher’s prediction of the importance of many loci of  
108 small effect, often dubbed the “infinitesimal model” (Fisher, 1918; Barton *et al.*, 2017). It is  
109 therefore important to explore analyses that allow for all possible trait architectures.

110

111 Using an F2 breeding cross design, we examine the genetic basis of seven life history traits  
112 in guppies: female age (1) and size (2) at first brood, first brood size (3), interbrood period  
113 (4), average dry offspring weight in the first brood (5), and male age (6) and size (7) at  
114 maturity. Our aims are to assess the relative extents to which different facets of life history  
115 traits have significant genetic elements, and whether guppy life history traits are better  
116 explained by polygenic, oligogenic, or monogenic models. By exploring the genetic bases of  
117 these traits within a system for which rapid adaptation and convergent evolution is already

## Genetic architecture of guppy life history

---

118 well-documented, we can better understand the role of quantitative genetic architecture in  
119 these processes.

120

### 121 **METHODS**

#### 122 ***Crosses***

123 Fish were second and third generation lab-reared individuals from an HP site in the Yarra  
124 river (680415E, 1193791N) and an LP site in the Quare river (696907E, 1181003N) (Figure 1).

125 These populations have demonstrable HP-LP life history phenotypes (Table S1), and have  
126 been studied extensively in prior work (Reznick, 1982; Reznick *et al.*, 1996, 2004, 2005).

127 Four F2 full-sib intercrosses were performed. Two crosses were performed for each cross  
128 direction in which wild-caught LP males were crossed with wild-caught HP females and vice  
129 versa. F1s were mated within cross and F2s were phenotyped and genotyped. Grandparents  
130 were also genotyped.

131

## Genetic architecture of guppy life history

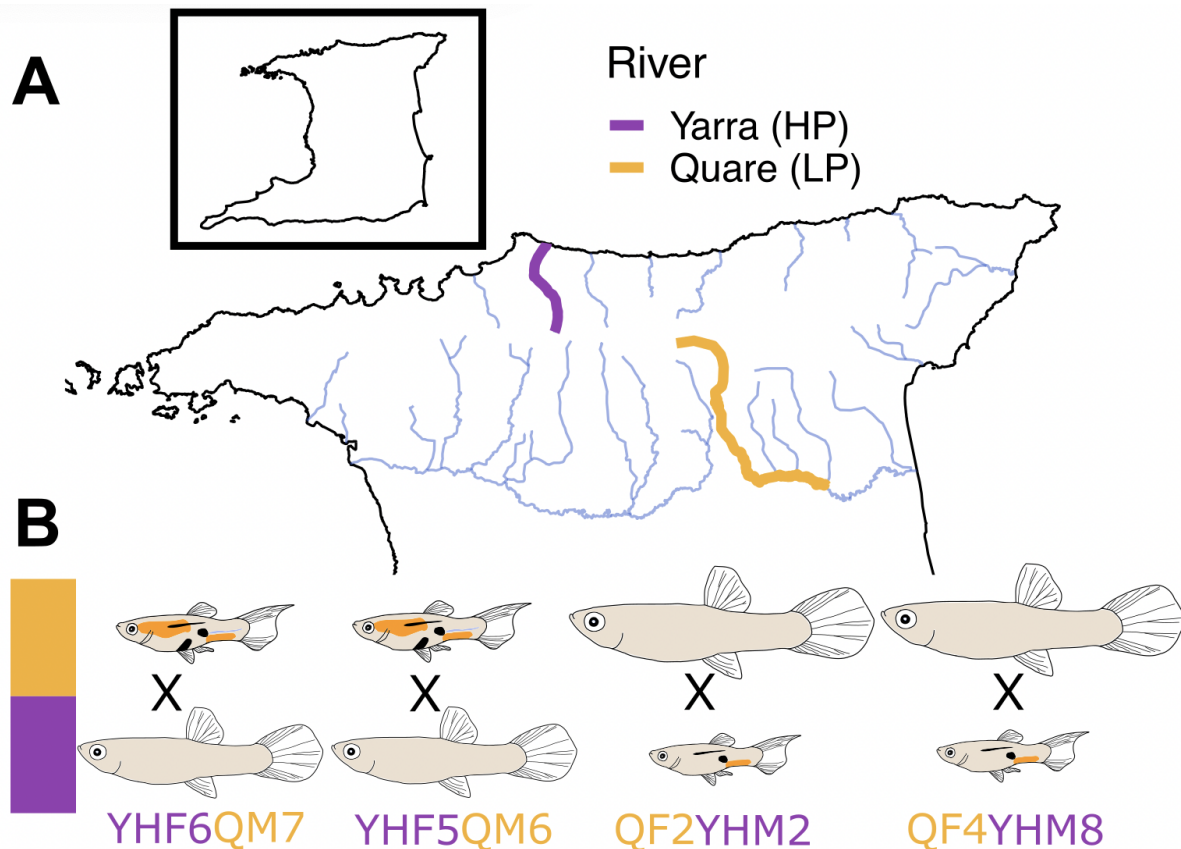

132

133

134

135

136

137

138

139

140

**Figure 1:** Sampling rivers in Trinidad and cross design. Sampling rivers are highlighted along with a number of major rivers from northern Trinidad's three drainages (A). Four families were produced from eight grandparents (B), two for each cross direction. Males (smaller, colourful) and females (larger, uncoloured) in panel B also highlight common morphological differences between HP (smaller, less colourful) and LP individuals.

140

### *Phenotyping and Phenotype GLMs*

141

142

143

144

145

146

147

Life history phenotyping and rearing followed (Reznick, 1982); full rearing details are available in the supplementary materials. Size of females and males was measured under a dissecting scope with Vernier calipers following MS-222 anaesthetisation. Based on the allometric dependency of female brood size, we took residual brood size as the residual difference between observed and linear-predicted brood size based on size. Male age at maturity was judged from the development of the apical hook. Interbrood period was scored as days between first and second parturition. Offspring weight was recorded as the



## Genetic architecture of guppy life history

---

148 mean dry weight of individuals from the first litter (data from the second litter was highly  
149 correlated). Where necessary, phenotypes were log-transformed to improve fit for  
150 normality assumptions.

151

152 Rearing (mean temperature and date of birth (DOB)) and family effects on phenotypes were  
153 explored using generalized linear models (GLM) in R (v4 (R Core Team, 2020)). DOB was  
154 included as a proxy for subtle unmeasured changes in rearing conditions over time. We used  
155 backwards model selection implemented in *step()*, starting from an additive model including  
156 family, temperature, and DOB. Relevant model assumptions were checked by comparing  
157 residuals to simulated residuals in the R package *DHARMA* (Hartig, 2020). Final model term  
158 significance was determined by comparing models with and without each independent  
159 variable using *drop1()* in terms of  $\Delta$ AIC and using F-tests. Where model assumptions could  
160 not be met, final model terms were taken and significance ( $p < 0.05$ ) of Spearman's rank  
161 correlations were used to confirm model effects. Adjusted partial R-squared was estimated  
162 for all final model variables with the R package *rsq* (Zhang, 2020) using the variance-  
163 function-based type.

164

### 165 **Genotyping**

166 Genomic DNA was extracted from fin clips using an ammonium acetate extraction method  
167 (Nicholls *et al.*, 2000; Richardson *et al.*, 2001). We genotyped each individual using a RAD-  
168 seq library preparation method adapted from Poland and colleagues (Miller *et al.*, 2007;  
169 Baird *et al.*, 2008; Poland *et al.*, 2012); full genotyping details are available in the  
170 supplementary materials. Of all 661 individuals used in the final analysis, 61 were  
171 sequenced two or three times in separate libraries to account for low coverage ("merged"

## Genetic architecture of guppy life history

---

172 individuals in Table S2). To ensure optimal coverage, and reduce PCR duplicate effects, all  
173 eight grandparents were sequenced four times in four separate PCR reactions and  
174 sequencing libraries. Of the total 653 F2s, 637 (370 males, 267 females) were used for  
175 phenotype analyses due to missing phenotypes for 16 individuals.

176

### 177 ***Bioinformatic processing***

178 Raw read data were trimmed and adaptors removed using cutadapt (Martin, 2011). Stacks  
179 v2.5 was used for all downstream processing (Rochette *et al.*, 2019). Trimmed read data  
180 were used as input in process\_radtags, with options to remove reads with uncalled bases (-  
181 c), quality filter at Q10 (-q), and rescue barcodes and RAD tags containing sequencing error  
182 (-r). Cleaned RAD tags were aligned to the male guppy reference genome using BWA-MEM  
183 (Li, 2013), and converted to bam format using samtools. Read group information was added  
184 to bam files using Picard Tools v2.6.0 AddOrReplaceReadGroups (Broad Institute, 2019) and  
185 alignments based on the same individual were merged using Picard Tools MergeSamFiles.  
186 Bam files were used as input for the gstacks module in Stacks2, using only alignments with a  
187 minimum mapping quality of 20. The final VCF contained only loci called across all  
188 individuals (-p 1), at a max-missing frequency of 80% (-r 80) and minor allele frequency (-  
189 maf) of 5%. Samples were retained with  $\geq 15X$  average coverage, average coverage across  
190 the samples was 33.4X (Table S2) and average missing data was 0.05%. For QTL scans  
191 genotypes were imputed based on grandparental phasing (see below).

192

### 193 ***Linkage mapping***

194 Linkage maps were produced with Lep-MAP3 (Rastas, 2017). Pedigrees were produced for  
195 each cross by including dummy parents (one pair per cross) from which all F2s descended.

## Genetic architecture of guppy life history

---

196 Genotype likelihoods were called from the VCF input with the *ParentCall2* module, including  
197 the *-halfSibs=1* flag. Further filtering was performed with the *Filtering2* module removing  
198 markers with a MAF < 0.1 (within families) and with missing data in >10% of individuals  
199 (within families). Markers were mapped to linkage groups (LG) with *SeperateChromosomes2*  
200 modules based on a logarithm of the odds (LOD) score of 20, using all informative markers,  
201 and grandparental phase information. LGs with fewer than 20 markers were discarded,  
202 leaving 21 LGs. The two largest LGs were separated by further iterations of  
203 *SeperateChromosomes2* run over these specific LGs with an elevated LOD limit of 30. This  
204 produced 23 LGs in agreement with the guppy genome. Unmapped markers were joined to  
205 the 23 LGs with the *JoinSingles2All* module, with an LOD limit of 5. The module was iterated  
206 until no further markers could be mapped. In total, 7,256 markers of 16,539 were mapped  
207 to LGs. The module *OrderMarkers2* was then run over each LG independently to order and  
208 place markers within LGs. An initial 10 iterations were performed, with order determined by  
209 maximum likelihood. For chromosome 12, male recombination was not permitted given  
210 previous evidence that males do not recombine over the sex chromosome (Charlesworth,  
211 Zhang, *et al.*, 2020). LOD scores from these maps were used to further filter markers on the  
212 basis of support for multiple mapping within a LG (multiple LOD peaks) or if maximum LOD  
213 was within one standard deviation of the mean. These markers were blacklisted for the final  
214 *OrderMarkers2* run, in which the *evaluateOrder* flag was run over the earlier maximum-  
215 likelihood based map. Final maps were sex-averaged and trimmed according to graphical  
216 evaluation. Grandparental-phased genotypes were exported for QTL analysis. Effects of  
217 female-biased heterochiasmy (Bergero *et al.*, 2019) on linkage maps are discussed in the  
218 supplementary material.

219

## Genetic architecture of guppy life history

---

### 220 ***Heritability and multi-locus estimates of trait architecture***

221 We used Genome-wide Complex Trait Analysis (GCTA) (Yang, Lee, *et al.*, 2011) to estimate  
222 phenotype heritability. This approach estimates the heritability of phenotypes by  
223 partitioning phenotypic variance into genetic variance (specifically of the SNPs sequenced  
224 rather than heritability in the traditional sense), random genetic effects and residual  
225 variance using the restricted maximum likelihood (REML) method within a linear mixed  
226 model. Empirical support suggests that heritability estimates using this method are  
227 comparable to those estimated from true pedigree studies (Stanton-Geddes *et al.*, 2013;  
228 Duntsch *et al.*, 2020). We first separated SNP data into males and females and, for each,  
229 estimated a genetic relatedness matrix (GRM) using all SNPs. SNPs from scaffolds were  
230 merged onto the beginning/end of chromosomes according to the linkage map (Table S3) to  
231 improve the accuracy of per-chromosome estimates. To account for genetic variance among  
232 the four families, we included the first three eigenvectors from PCA (the minimum number  
233 required to separate four families) as quantitative covariates. Specifically, these analyses are  
234 assessing within-family associations between genetic covariance and phenotypic variance,  
235 and allowing for among-family intercepts to vary. Rearing covariates were included in a  
236 trait-specific manner if these were associated with the phenotype (Table S4). To assess  
237 within-family effects, we included an additional GRM calculated with the *--make-bK 0.05*  
238 parameter. The addition of this GRM allows us to partition variance into that associated  
239 with sequenced SNPs (G1) and within-family structure (G2). At the per-chromosome level,  
240 including this additional GRM prevented model convergence in some cases (11/138  
241 chromosome-phenotype pairs), but we observed negligible differences in heritability  
242 estimated with and without this additional GRM at the whole-genome level.

243

## Genetic architecture of guppy life history

---

244 To estimate the heritability associated with specific chromosomes ( $h^2c$ ), we took two  
245 approaches: 1) We partitioned phenotypic variance using a model with a GRM derived from  
246 the focal chromosome and quantitative covariates; 2) We used a likelihood-ratio test (LRT)  
247 approach following (Santure *et al.*, 2013, 2015; Duntsch *et al.*, 2020) in which we compared  
248 a full model *a* (GRM based on all chromosomes except focal chromosome + focal  
249 chromosome GRM) to a reduced model *b* (without focal chromosome GRM). Quantitative  
250 covariates were included in both models. Models were compared with a LRT according to  
251 (1), with p-values taken from the chi-squared distribution with one degree of freedom.

252

$$253 \quad LRT = -2(L_a - L_b) \quad (1)$$

254

255 Correlations can reveal polygenic architectures. Positive correlations suggest traits are  
256 associated with many loci of small effect, assuming chromosome size is a proxy for  
257 functional loci count. Previous work has suggested p-values derived from both chromosome  
258 partitioning approaches highlighted above are comparable (Kemppainen and Husby, 2018a),  
259 so we used  $h^2c$  estimations from focal chromosome GRMs (approach 1) as issues with  
260 model convergence prevented estimations of  $h^2c$  on chromosomes that accounted for little  
261 phenotypic variance under approach 2 (see Table S5). Regressions were performed using  
262 the *HC\_Correction()* function presented by Kemppainen and Husby (2018b), which corrects  
263 for heteroscedasticity among chromosomes and the constraint of GCTA models that  
264 prevents negative estimations of  $h^2c$ .

265

266 **QTL scans**

## Genetic architecture of guppy life history

---

267 We produced two datasets for QTL-scanning. The first included fully-informative SNPs for  
268 both founding populations, i.e. SNPs that were homozygous in all eight grandparents and  
269 fixed for alternative variants between HP and LP-derived grandparents. This dataset  
270 included 1,220 SNPs, and allowed for analysis of all individuals together to increase  
271 biological power, where individuals could inherit an HP (H) or LP (L) allele. The second  
272 dataset comprised four separate datasets, one for each family in which family-informative  
273 SNPs were included for each family (homozygous, alternative, SNPs in each grandparent  
274 within families). Numbers of family-informative SNPs for each family were similar (3,436;  
275 3,400; 3,476; and 3,476 for QF2YHM2, QF4YHM8, YHF5QM6, and YHF6QM7 respectively).  
276 These datasets provided weaker biological power, but increased resolution within families,  
277 and also allowed us to examine alleles that may have only been captured and are  
278 segregating in single crosses. It is important to note, these latter datasets cannot be used to  
279 assess loci that are Y-linked. Because all males within a family carry the same Y, the effect of  
280 different Y loci among families cannot be separated from general genome-wide relatedness  
281 within and among families that captures many autosomal loci.

282

283 We first performed single locus scans using the *scan1()* function in R/qtI2 (Broman *et al.*,  
284 2019). We inserted pseudomarkers using *insert\_pseudomarkers()* with *step=1*, calculated  
285 genotype probabilities with *calc\_genoprob()* and an *error\_prob=0.002*, and converted  
286 genotype probabilities to allele probabilities using *genoprob\_to\_alleleprob()*. We calculated  
287 a grid with *calc\_grid()*, subsetted genotype probabilities to grid pseudomarkers with  
288 *probs\_to\_grid()*, and used this to calculate a kinship matrix with *calc\_kinship()* according to  
289 the Leave-One-Chromosome-Out method (LOCO). Rearing covariates and a binary family  
290 assignment matrix were included as additive covariates. Significance of LOD peaks was

## Genetic architecture of guppy life history

---

291 determined by 1000 permutations for all models with *operm()* at an  $\alpha$  of 0.05. For scans of  
292 the sex-determining region, inputs were merged for males and females, and the same  
293 methodology was used, with the exceptions that sex was modelled as a binary phenotype,  
294 and rearing covariates were excluded from the covariate matrix.

295

296 We also explored QTL scans that allow for multiple QTLs using the *stepwiseqtl()* function in  
297 R/qtl (Broman *et al.*, 2003) which is not available in R/qtl2. This approach assesses  
298 interactions among all pairs of loci, allowing for epistatic effects to be examined. We  
299 allowed for models with a maximum of six loci, used the imputation method, and allowed  
300 for only additive interactions among loci. Significance of LOD peaks was determined based  
301 on 1000 permutations.

302

## 303 RESULTS

### 304 *Phenotypes*

305 Both male age (GLM:  $F_{3,340} = 14.75$ ,  $p = 4.82e^{-9}$ ) and size at maturity (GLM:  $F_{3,340} = 16.02$ ,  $p =$   
306  $9.30e^{-10}$ ) of F2s varied significantly between the four cross families (Figure S1A; Table S4).

307 For age at maturity, cross YHF5QM6 F2s tended to mature later than all other crosses  
308 (Tukey  $p < 0.05$ ), and for size at maturity, cross QF4YHM8 F2s matured at a larger size. Male

309 age and size at maturity were not strongly associated with one another (correlation of

310 individuals, Spearman's  $\rho = -0.07$ ,  $p = 0.184$ ), but a GLM of male size at maturity by an

311 interaction between age at maturity and family revealed a significant effect (GLM:  $F_{3,340} =$

312  $2.98$ ,  $p = 0.031$ ). However, within this model relationships between male age and size at

313 maturity were both positive and negative depending on family. Rearing conditions affected

314 both male phenotypes. Males matured earlier under increased temperatures (GLM:  $F_{1,340} =$

## Genetic architecture of guppy life history

---

315 13.75,  $p = 2.40e^{-4}$ ) and if born later in the experiment (GLM:  $F_{1,340} = 23.26$ ,  $p = 2.15e^{-6}$ ).  
316 Larger males at maturity tended to be born later in the experiment (GLM:  $F_{1,340} = 41.51$ ,  $p =$   
317  $4.06e^{-10}$ ), but temperature did not affect size at maturity. Family status explained 10.4% and  
318 11.7% of phenotypic variance for age and size at maturity respectively, which will not be  
319 captured by our subsequent mapping approaches.

320

321 Female phenotypes were generally less variable among families, only female size at first  
322 brood (GLM:  $F_{1,265} = 11.88$ ,  $p = 6.04e^{-4}$ ) and offspring weight (GLM:  $F_{1,249} = 3.03$ ,  $p = 0.030$ )  
323 differed significantly between families (Figure S1B; Table S4), with the latter effect only  
324 marginally significant. Consistent with a general life history axis, covariance among female  
325 phenotypes was generally high (Table S6). All female traits loaded positively onto PC1  
326 (37.6%), with female age (loading = 0.68) and size (loading = 0.58) loading particularly  
327 strongly. PC2 (27.0%) explained residual variance associated with brood traits, with first  
328 brood size (-0.62) and interbrood (-0.59) loading negatively, and offspring weight loading  
329 positively (0.44). PC2 therefore summarises variation among females with few, heavier  
330 offspring and short interbrood periods, and vice versa. Similar to males, females reached  
331 maturity and produced their first brood earlier under increased temperatures (GLM:  $F_{1,265} =$   
332  $21.65$ ,  $p = 5.19e^{-5}$ ). Increased temperature also reduced interbrood period (GLM:  $F_{1,265} =$   
333  $24.32$ ,  $p = 1.45e^{-6}$ ) and females born later in the experiment had longer interbrood periods  
334 (GLM:  $F_{1,265} = 13.47$ ,  $p = 2.94e^{-4}$ ). Other female phenotypes were not associated with rearing  
335 conditions (Table S4). In contrast to male phenotypes, family status explained much less  
336 phenotypic variance: 6.7% for first brood size, 5% for size at first brood, and 2.2% for  
337 offspring weight ('family' was dropped from other models due to low explanatory power).

338



## Genetic architecture of guppy life history

---

### 339 ***Linkage mapping***

340 The final linkage map consisted of 6,765 markers and a length of 1,673.8 cM. There was  
341 overall good concordance between this genetic map and the recently updated reference  
342 genome (Fraser *et al.*, 2020), with the additional placement of unplaced scaffolds on all  
343 linkage groups. There were also minor structural rearrangements and inversions (Figure S2),  
344 for which corroborative support could be found from previously published HiC data (Fraser  
345 *et al.*, 2020). Typically, unplaced scaffolds were joined to either chromosome end (Table S3;  
346 Figure S2).

347

### 348 ***Heritability and multi-locus estimates of trait architecture***

349 Heritability varied between traits, but in almost all cases (excluding first brood size) the  
350 variance explained by within-family structure ( $V_{G2}$ ) was greater than the variance explained  
351 by the specific SNPs themselves ( $V_{G1}$ ). This is expected given RAD-sequencing is designed to  
352 capture SNPs in linkage with causal variants, rather than causal variants themselves.

353 Estimates of heritability were greatest for male size at maturity (43.4%), offspring weight  
354 (33.4%), male age at maturity (31.3%), and interbrood period (30.2%). Estimates for the  
355 remaining female life history traits were lower, not exceeding 9.7% (female size at first  
356 brood), with standard errors that overlapped 0 (Table 1).

357

358

359

360

361

## Genetic architecture of guppy life history

362 **Table 1:** Estimates of genome-wide heritability for each phenotype based on GCTA-GREML.  
 363 Phenotypic variance ( $V_P$ ) is partitioned into variance explained by sequenced SNPs ( $V_{G1}$ ),  
 364 genetic family structure ( $V_{G2}$ ) and residual variance ( $V_E$ ). Final estimates of phenotypic  
 365 variance partitions are given as proportions. All estimates include standard error.

| Phenotype                        | $V_{G1}$    | $V_{G2}$     | $V_E$        | $V_P$        | $V_{G1}/V_P$ | $V_{G1+G2}/V_P$ |
|----------------------------------|-------------|--------------|--------------|--------------|--------------|-----------------|
| Age at first brood (F)           | 0 ± 0       | 0 ± 0        | 0.02 ± 0     | 0.02 ± 0     | 0.03 ± 0.19  | 0.033 ± 0.1     |
| Size at first brood (F)          | 0 ± 0       | 0 ± 0        | 0.01 ± 0     | 0.01 ± 0     | 0 ± 0.2      | 0.097 ± 0.11    |
| First brood size (F)             | 0.78 ± 1.96 | 0.12 ± 2.14  | 8.86 ± 1.09  | 9.76 ± 0.89  | 0.08 ± 0.2   | 0.092 ± 0.1     |
| Interbrood period (F)            | 0 ± 0       | 0 ± 0        | 0.01 ± 0     | 0.02 ± 0     | 0.17 ± 0.27  | 0.302 ± 0.12    |
| First brood offspring weight (F) | 0 ± 0.02    | 0.03 ± 0.03  | 0.06 ± 0.01  | 0.09 ± 0.01  | 0 ± 0.28     | 0.334 ± 0.12    |
| Age at maturity (M)              | 0 ± 0       | 0.004 ± 0    | 0.009 ± 0    | 0.013 ± 0    | 0 ± 0.2      | 0.313 ± 0.09    |
| Size at maturity (M)             | 0 ± 0.07    | 0.156 ± 0.08 | 0.203 ± 0.03 | 0.358 ± 0.03 | 0 ± 0.18     | 0.434 ± 0.09    |

366  
 367 We repeated the analysis on each chromosome to test whether these estimates could be  
 368 explained disproportionately by certain chromosomes, or whether per-chromosome  
 369 associations may exist that cannot be observed within genome-wide estimates. Estimates of  
 370  $h^2c$  based on single chromosome GRMs revealed six chromosomes significantly associated  
 371 with male size at maturity, four chromosomes with male age at maturity, and one  
 372 chromosome with offspring weight (FDR ≤ 0.05; Table S7; Figure 2A). Of these however,  
 373 according to the LRT approach only three chromosomes for male size at maturity (chr5:  
 374 20.7%, chr23: 13.9%, chr11: 13.3%), two for male age at maturity (chr1: 14.7%, chr10:  
 375 14.4%) and one for offspring weight (chr19: 8.4%) were significantly associated (LRT  $p$  ≤  
 376 0.05; Table S5). Following multiple-testing correction within phenotypes, only the  
 377 associations between chr5 and male size at maturity (LRT = 9.346,  $fdr$  = 0.046), and chr19  
 378 and offspring weight (LRT = 9.264,  $fdr$  = 0.046) were significantly associated according to  
 379 both methods. Agreement between both methods was good according to a correlation of p-  
 380 values (Spearman's  $\rho$  = 0.827,  $p$  < 2.2e-16). Whilst the correlation here is strong, there is a  
 381 clear downward biasing of p-values from single chromosome GRMs, evident as a shift away  
 382 from the  $y=x$  relationship (Figure S3).

383

## Genetic architecture of guppy life history

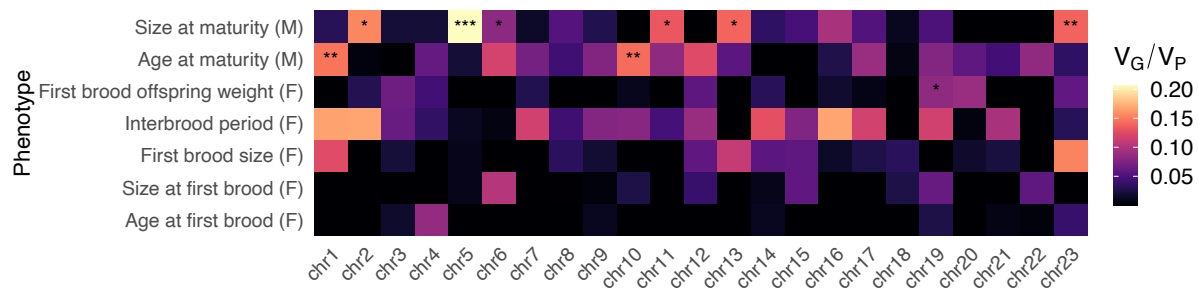

384  
385

386 **Figure 2:** Estimates of phenotypic variance proportions explained by per-  
387 chromosome genetic relatedness matrices ( $h^2c$ ). Tiles are coloured according to the  
388 relative proportion of genetic variance ( $V_G$ ) to phenotypic variance ( $V_P$ ). FDR-  
389 corrected p-values (corrected within phenotypes across all chromosomes) are  
390 displayed as asterisks FDR  $\leq 0.05 = *$ ; FDR  $\leq 0.01 = **$ ; FDR  $\leq 0.001 = ***$ .

391  
392

393 We found positive correlations associated with single chromosome GRM estimates of  $h^2c$   
394 and chromosome size (following the addition of scaffold sizes according to the linkage map;  
395 Figure S4) for interbrood period ( $r = 0.373$ ,  $p = 0.04$ , HC-corrected  $p = 0.105$ ) and male size  
396 at maturity ( $r = 0.253$ ,  $p = 0.122$ , HC-corrected  $p = 231$ ), however these were not significant  
397 following HC-correction.

398

### 399 **QTL mapping**

400 We first mapped sex as a binary trait. The location of the sex-determining locus has been  
401 narrowed down to a small region at the distal end of chromosome 12 (Fraser *et al.*, 2020;  
402 Charlesworth, Bergero, *et al.*, 2020). Our QTL mapping recovered a single large peak on  
403 chromosome 12 (17.79 cM), with confidence intervals extending from 5.35-27.78 cM (Figure  
404 S5). In our map, the region following this (27.78-61.79 cM) corresponds to the very distal tip  
405 of chromosome 12 (approximately 24.6 Mb onwards, plus additionally placed scaffolds),  
406 which is the only fully recombining region of this chromosome and is pseudoautosomal  
407 (Charlesworth, Zhang, *et al.*, 2020). This places the sex-determining region somewhere in

## Genetic architecture of guppy life history

---

408 the non-recombining region immediately prior to the pseudoautosomal region (PAR), as  
409 proposed by others (Fraser *et al.*, 2020; Charlesworth, Bergero, *et al.*, 2020). This analysis  
410 therefore confirms good power to detect loci of large effect and confirms previously  
411 published information about the sex chromosome and region containing the sex-  
412 determining locus.

413

414 We then mapped female traits using all fully informative markers (N = 1220) across all 267  
415 females. Applying a permuted 5% threshold (N=1000), we detected two QTL. The strongest  
416 QTL was associated with first brood offspring weight at the very distal tip of chr19  
417 (chr19:66.954) (Figure 3B), explained 7.46% of phenotypic variance, and exhibited additive  
418 effects in which the HH homozygotes produced smaller offspring than LL homozygotes  
419 (Figure 3C). Confidence intervals (drop in LOD of 1.5) extended between 55.335-67.877 cM.  
420 The other QTL was associated with size at first brood (chr22:63.593) (Figure 3D), explained  
421 5.94% of phenotypic variance, and exhibited additive effects in which the HH homozygotes  
422 had their first brood at a larger size than LL homozygotes (Figure 3E); contrary to HP-LP  
423 expectations. Confidence intervals for the chromosome 22 QTL extended between 44.235  
424 cM - 68.753 cM.

425

## Genetic architecture of guppy life history

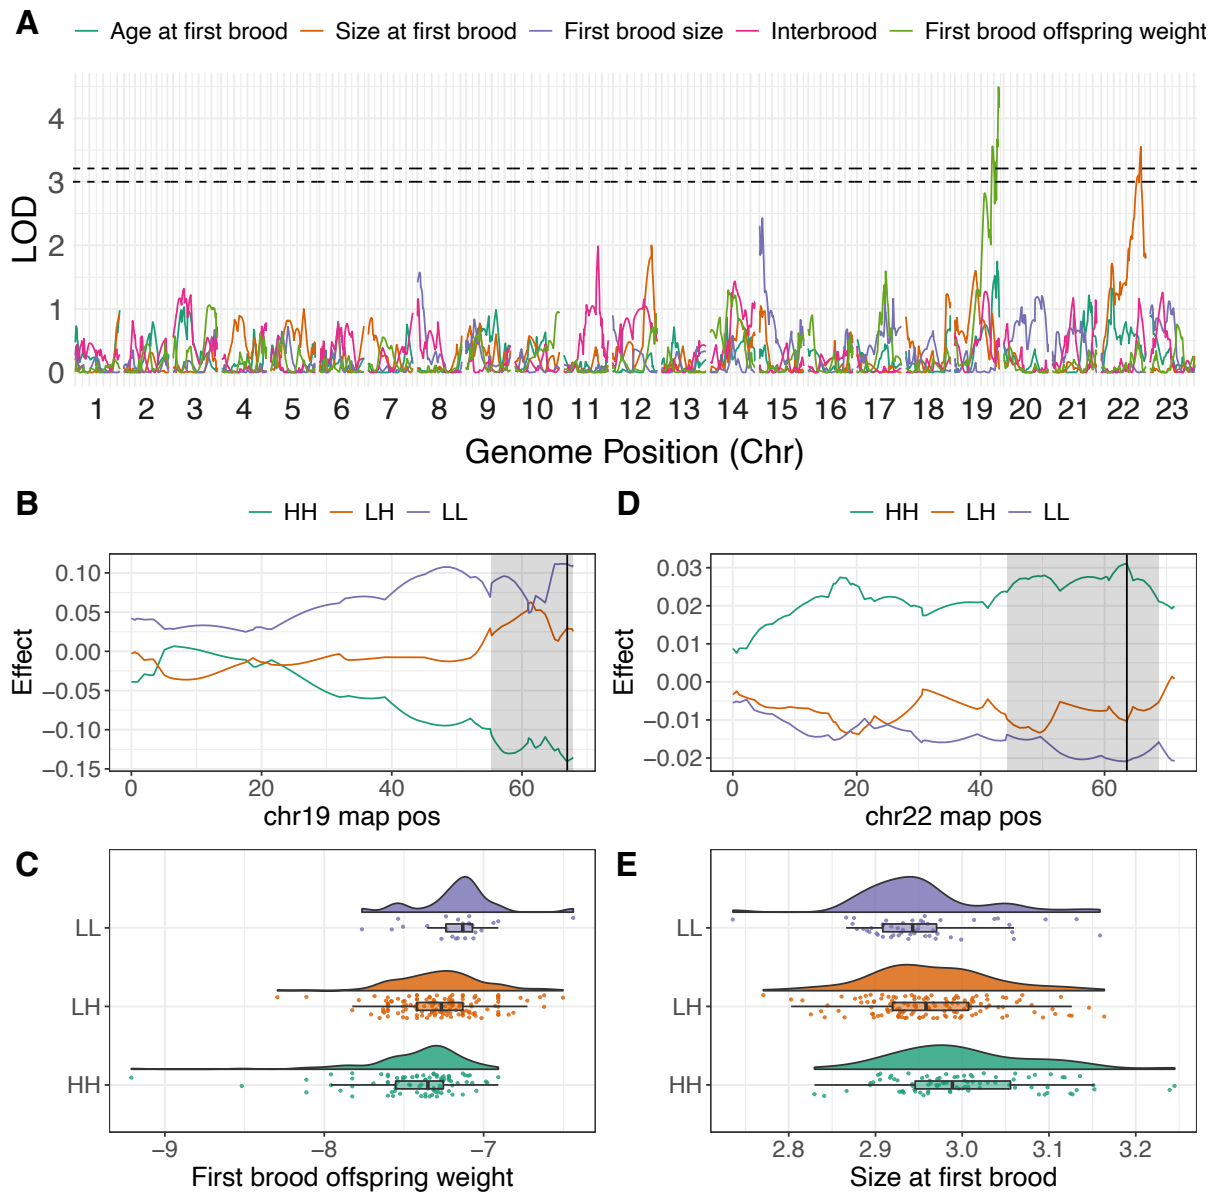

426

427

428 **Figure 3:** Single locus QTL scans for female life history traits: Age at first brood  
 429 (days), size at first brood (cm), first brood size (residual), interbrood period (days)  
 430 and first brood offspring weight (g). All female traits were log-transformed. Panel **A**  
 431 shows genome-wide additive model scan results for all traits. 5% significance  
 432 thresholds are denoted. Significant QTLs for offspring weight (chr19, **B-C**) and size  
 433 at first brood (**D-E**) are visualised in further detail. Panels **B-E** show QTL effects  
 434 across the focal linkage groups (**B** and **D**), and distributions of phenotypes across  
 435 genotypes at the peak (**C** and **E**). In panels **B** and **D**, the QTL peak is shown as a  
 436 black line, with confidence intervals (LOD drop = 1.5) highlighted by grey shaded  
 437 areas.

438

439

440 Scans within each of the four families identified an additional three QTL (Figure S6-7). Two

441 of these were observed in cross YHF5QM6, associated with first brood size (chr23:37.33,

## Genetic architecture of guppy life history

442 LOD = 3.386, ci low = 4.589 cM, ci high = 53.588 cM) and interbrood period (chr12:60.713,  
443 LOD = 3.406, ci low = 54.701 cM, ci high = 72.487 cM). These QTL explained 18.55% and  
444 18.65% of phenotypic variance within their families respectively. The QTL linked with  
445 interbrood period here is particularly interesting given its proximity to the sex-determining  
446 region. We also detected a QTL associated with female interbrood period in cross QF4YHM8  
447 (chr14:28.41, LOD = 3.559, ci low = 28.412 cM, ci high = 67.316 cM), explaining 17.9% of  
448 phenotypic variance for this trait in this family.

449

450 We applied the same methodology to male traits, however we did not recover any  
451 significant QTLs across the whole dataset (Figure 4). Within the YHF6QM7 cross, we  
452 observed a significant QTL associated with male mature length on chromosome 23  
453 (chr23:31.741, LOD = 3.462, ci low = 0 cM, ci high = 52.193 cM) (Figure S8-9). This  
454 confidence interval covered the majority of the chromosome, and the QTL explained 9.48%  
455 of phenotypic variance in this cross. At this QTL, HP homozygotes matured at a smaller size  
456 than LP homozygotes.

457

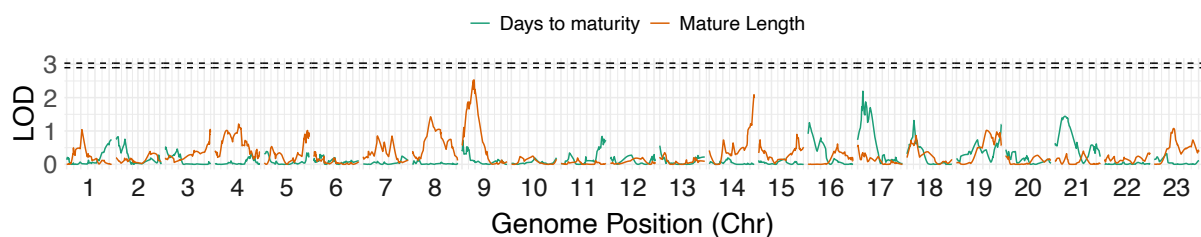

458

459

460 **Figure 4:** Single locus QTL scans for male life history traits: Days to maturity (log-  
461 transformed), length at maturity (mm). No significant QTLs were detected.

462

463

464 We also explored multi-QTL models using *r/qtl's stepwiseqtl()*, allowing for models that fit

465 up to six loci, with the same additive covariance matrices of family and rearing covariates

## Genetic architecture of guppy life history

---

466 used previously. For female models, this approach returned null models for all phenotypes  
467 except size at first brood and offspring weight, for which we recovered single QTL models  
468 including only the QTL loci previously identified above. For males, null models were  
469 returned for both phenotypes.

470

### 471 ***Candidate genes***

472 Taken together, we find that where traits are heritable, they are associated with whole  
473 chromosomes, suggestive of large polygenic regions, rather than single large effect QTL.  
474 However, we observed two significant QTL for female traits (offspring weight chr19:66.954  
475 and size at first brood chr22:63.593). We also observe several significant QTL within specific  
476 families. Of these, the QTL associated with interbrood in cross YHF5QM6 (YHF5QM6-  
477 chr12:60.71) is of particular interest given its proximity to the sex-determining region and  
478 relatively narrow confidence intervals. We therefore explored these three regions further  
479 for candidate genes. Full information on candidate genes can be found in Table S8.

480

481 The QTL at chr19:66.954, associated with offspring weight, covered ~8.2 Mb of chromosome  
482 19, and included 267 genes. Due to the large size of this region, and that alternative  
483 confidence intervals (Bayesian 5% probability intervals) suggested a single peak at  
484 chr19:66.954, we limited our curation of candidate genes to the immediate 0.5 Mb either  
485 side of the peak (chr19:18602889-19602889). This region included 40 genes. Several of  
486 these genes (*wfikkn2b*, *tob1b*, *sap30bp*, *h3-3b*, *unk*, *mrpl38*, *fdxr*, *narf*, *cybc1*) are expressed  
487 in all stages of embryonic development in zebrafish, or interact with growth signalling  
488 pathways, suggesting potential functional effects for offspring weight. The closest gene to  
489 the peak was *cdr2l*. Of the 40 genes in this region, 18 exhibited female-biased differential

## Genetic architecture of guppy life history

---

490 expression in gonads based on the guppy transcriptome (Sharma *et al.*, 2014), and six  
491 exhibited male-biased expression (Table S8), suggesting potential reproductive function.

492

493 The chr22 QTL peak (for size at first brood) was on a previously unplaced scaffold  
494 000111F\_0:651336 and confidence intervals extended over the scaffold (00111F\_0:528180-  
495 1199617) and a region at the distal end of chromosome 22 (chr22:23415429-24223839).

496 The peak of the QTL did not overlap any genes, however the closest gene was F-box protein  
497 33, *fbxo33*. In total, the region included 45 genes. There were no genes with GO terms or  
498 KEGG annotations indicative of clear roles in growth. According to the GeneCards database  
499 however, several genes had evidence of affecting size and growth phenotypes in mice  
500 knockout studies (*fbxo33*, *tonsl*, *cnr1*, *cga*, *htr1b* and *myo6*). Two of the genes (*cga* and  
501 *htr1b*) in this region are also associated with various hormonal pathways, including  
502 gonadotropin hormone signalling that may affect development. Other genes in this region  
503 are associated with myogenesis, including *myo6* and genes within the Akirin family (*akirin2*,  
504 *gabrr1*, *pm20d2*, *cnr1*, *syncr1pl*). In addition, the gene *snx14* has been associated with  
505 growth QTLs in grass carp (Huang *et al.*, 2020).

506

507 The interbrood period QTL on chr12 overlapped the YTH domain containing 1 gene, *ythdc1*,  
508 on a previously unplaced scaffold 000149F\_0 (000149F\_0: 131600). This scaffold was placed  
509 at the distal end of chromosome 12 near the sex-determining region, and corresponds with  
510 scaffold KK215301.1 in the older female genome (Künstner *et al.*, 2016), which has similarly  
511 been placed at the distal end of chromosome 12 in other mapping studies (Charlesworth,  
512 Bergero, *et al.*, 2020). The confidence interval around this QTL covered additional regions of  
513 scaffold 000149F\_0 (000149F\_0:47124-197258) and chromosome 12 (chr12:24525856-



## Genetic architecture of guppy life history

---

514 24705290). This region included 18 genes, but none were associated with clear GO or KEGG  
515 terms indicative of roles for female fertility. Four genes exhibited female-biased expression  
516 in gonads and seven were male-biased. The gene overlapping the QTL peak, *ythdc1*,  
517 however is a promising candidate due to its interactions with N6-methyladenosine ( $m^6A$ )  
518 (Wang *et al.*, 2015; Xia *et al.*, 2018). Disruption of  $m^6A$  by mutation of another modifier  
519 *mettl3*, affected oocyte development and reduced the proportion of full-growth follicles in  
520 zebrafish (Xia *et al.*, 2018). Further, *Ythdc1*-deficient mice have oocyte maturation blocked  
521 at the primary follicle stage and experience alternative splicing defects in oocytes (Kasowitz  
522 *et al.*, 2018). Examination of transcripts matching *ythdc1* (largest = CUFF\_24477\_m.316355)  
523 in the guppy transcriptome (2014) revealed significant overexpression in ovaries compared  
524 with testes. Sequence analysis alongside other Poeciliids (Ensembl release 101: *P. formosa*,  
525 *P. latipinna*, *P. mexicana*, and *Xiphophorus maculeatus*) demonstrated significant purifying  
526 selection on this gene ( $dN/dS \leq 0.197$ ; Z-tests for purifying selection:  $2.79 \leq Z \leq 7.40$ ; Table  
527 S9). These provide strong evidence for a functional reproductive role for this gene in  
528 guppies.

529

## 530 **DISCUSSION**

531 Using an F2 cross design of outbred populations with divergent life history phenotypes, we  
532 have demonstrated both polygenic and oligogenic trait architectures underlying guppy life  
533 history evolution. For both male size and age at maturity, we find significant heritability  
534 associated with particular chromosomes, suggesting polygenic traits, but little evidence of a  
535 genome-wide signal of polygenicity or single loci of large effects. For the five females traits,  
536 we recovered significant genome-wide estimates of heritability associated with interbrood  
537 period and offspring weight. For offspring weight, all per-chromosome estimates of

## Genetic architecture of guppy life history

---

538 heritability were generally weak, but we did identify a single locus of large effect at the  
539 distal end of chromosome 19, suggesting an oligogenic architecture. For interbrood period,  
540 we detected a weak genome-wide polygenic signal as an association between chromosome  
541 size and per-chromosome heritability and also found evidence of a single locus of large  
542 effect on the sex chromosome, LG12, in a single family. Together, these results suggest  
543 interbrood period has an oligogenic genetic architecture consisting of a combination of  
544 genome-wide polygenic loci and an individual locus of larger effect. We also detected a  
545 significant single-locus QTL associated with female size at first brood with a small effect size,  
546 but negligible estimates of genome-wide heritability for this trait. Finally, we found no  
547 evidence for heritable genetic architectures for female first brood size and age at first  
548 brood, although we observed a within-family QTL associated with first brood size on chr23.  
549  
550 The significant genetic components of guppy life history phenotypes found here are in line  
551 with previous laboratory rearing estimates of heritability; specifically, the high heritability of  
552 male traits, interbrood period, and offspring weight has been documented in laboratory-  
553 reared populations under controlled conditions (Reznick, 1982) and in LP-introduction  
554 experiments (Reznick *et al.*, 1997). However, there is mixed support for the heritability of  
555 female life history traits. Consistent differences between laboratory-reared HP and LP  
556 populations for female size and age at maturity and interbrood period have been observed  
557 (Reznick, 1982), and similarly, Torres-Dowdall *et al.* (2012) report consistent differences in  
558 female life history traits along a predation gradient in wild-caught vs lab-reared guppies  
559 from the Guanapo river. However, estimates of heritability of female age and size at  
560 maturity from experimental LP-introductions have shown inconsistent, often negligible,  
561 estimates of heritability (Reznick *et al.*, 1997). Interestingly, this latter study postulates that

## Genetic architecture of guppy life history

---

562 the higher heritability, and more rapid evolution, of male life history traits may involve  
563 significant loci associated with the Y chromosome, but we found no evidence here to  
564 support this (although see discussion about Y-linked male traits below). Rather, our results  
565 of a significant polygenic component of male age and size at maturity also predicts more  
566 rapid phenotypic evolution for males, as observed in experimental introductions (Reznick *et*  
567 *al.*, 1997).

568

569 Recent work has sought to compare the relative contributions of genetic and plastic effects  
570 on guppy life history. HP-LP comparisons are confounded by increased competition for  
571 available resources at high densities in LP sites (Reznick *et al.*, 2001), which can result in life  
572 history traits that are resource dependent. Across multiple laboratory-reared guppy crosses,  
573 Felmy *et al.* (2021), demonstrated that guppy life histories cluster together in terms of those  
574 strongly affected by resource plasticity (predominantly size-related traits), those affected by  
575 HP-LP ecotype (including interbrood interval and offspring weight), and those affected by  
576 both or neither. For female traits, these results align well with ours, particularly the higher  
577 within-family heritability for interbrood period and offspring weight (Table 1), and the  
578 absence of strong signatures of genetic architectures associated with female size at  
579 maturity. The phenotypic covariances for female traits observed here (Table S6) also agree  
580 with the proposed “mosaic” of guppy life history traits (Felmy *et al.*, 2021). Felmy *et al.*  
581 (2021) also demonstrate resource-based plasticity for male age and size at maturity,  
582 however these likely operate alongside underlying genetics, in agreement with observations  
583 here, and documented in other studies of male guppy life history (Reznick, 1982; Reznick *et*  
584 *al.*, 1997, 2005).

585

## Genetic architecture of guppy life history

---

586 Guppy life history traits are also plastic with respect to other features of local environments.  
587 Predator cues, for example, influence female size at maturity (Torres-Dowdall *et al.*, 2012)  
588 and growth rate (Handelsman *et al.*, 2013), and resource availability affects female  
589 reproductive investment (Reznick and Yang, 1993), the latter contributing comparable  
590 phenotypic variance to that associated with heritability. We also found significant  
591 associations between rearing conditions for both male age and size at maturity and female  
592 age at first brood and interbrood period. These rearing effects reflected small fluctuations in  
593 temperature (rearing temperature varied between 23.3-27.1 °C) and date of birth (used as a  
594 proxy for other unmeasured rearing conditions), suggesting additional plasticity associated  
595 with these phenotypes. Whilst we included rearing effects and family classification as  
596 covariates in our models, and controlled for resources during rearing, it is quite possible  
597 that additional sources of phenotypic plasticity may have obscured our analyses.  
598  
599 A limitation of our crossing design is that we cannot make across-family comparisons. We  
600 controlled for family-specific intercepts in models, either by including kinship information or  
601 family status as covariates. However, family status accounted for significant phenotypic  
602 variance in five of our seven phenotypes (all except interbrood period and female age at  
603 first brood; Table S4). These may be attributed to family-specific alleles segregating across  
604 the genome, or Y-specifically, however we cannot separate these within the current dataset.  
605 We identified some large effect loci segregating within families (Figure S6-9), however our  
606 mapping of male phenotypes in particular will be blind to Y-specific QTL, given all males  
607 within a family share the same Y allele. Y-linked loci have been suggested to affect age and  
608 size at maturity phenotypes in other poeciliids (Kallman and Borkoski, 1978; Lampert *et al.*,

## Genetic architecture of guppy life history

---

609 2010), so there is reason to assume these regions may be important and comprise some of  
610 the phenotypic variance associated with family status (which is an upper limit).

611

612 Whilst we detected both polygenic and single-locus architectures for life history  
613 phenotypes, our study is limited by sample size. In part this is due to the modest brood sizes  
614 of guppies, which restricted our ability to generate larger F2 families, and also because the  
615 phenotypes considered are sex-specific. It is well known within quantitative genetics studies  
616 that small sample sizes can inflate estimates of heritability and QTL effect sizes, a  
617 phenomenon termed the “Beavis Effect” (Beavis, 1994; Rockman, 2012; Slate, 2013). In  
618 particular, sample size has been demonstrated to inflate p-values when run with single  
619 chromosome GRMs with GCTA (Kemppainen and Husby, 2018a), which explains why we  
620 recover more modest p-values when comparing single chromosome GRM results to the LRT  
621 approach. Our estimates of per-chromosome ( $h^2c$ ) and genome-wide heritability should  
622 therefore be treated with caution. More generally, this combined approach of using single  
623 chromosome GRMs and LRTs may be a useful strategy to alleviate issues with modest  
624 sample sizes associated with each approach individually. Specifically, this refers to the  
625 inflation of significance tests with single chromosome GRMs and issues with model  
626 convergence for chromosomes with minimal effects under the LRT approach.

627

628 The two main QTL observed here, detected across the whole dataset, reflect only marginal  
629 PVE (7.46% for offspring weight on chr19, and 5.94% for female size at first brood on chr22)  
630 which is likely inflated by our low sample size. Interestingly, each of these chromosome-  
631 phenotype pairings was also detected (marginal significance) by our multi-locus approaches.  
632 This suggests that these regions may be reasonably large, such that the peak (from which

## Genetic architecture of guppy life history

---

633 the PVE is calculated) only represents a portion of the variance explained by the wider  
634 region. Neither of these regions have been strongly implicated in HP-LP adaptation before in  
635 previous population genomic analyses (Fraser *et al.*, 2015; Whiting *et al.*, 2020), however  
636 Whiting *et al.* (2020) recorded a selection scan outlier within the chr22 QTL interval  
637 (chr22:23960000-23970000) in HP-LP comparisons from the Aripo and Madamas rivers. The  
638 closest gene to this outlier is *sox11a*. While selection scans of HP-LP comparisons are unable  
639 to determine which phenotype selection might be acting on, our results here suggest this  
640 region may be involved in female growth.

641

642 An absence of prominent large effect loci, as described here for the majority of the traits,  
643 would be expected to produce minimal molecular convergent evolution. This is predicted  
644 due to redundancy in the mapping of genotype to phenotype, which may allow replicate  
645 HP-LP pairs to use different sets of alleles to produce convergent HP-LP phenotypes (Barghi  
646 *et al.*, 2020). Limited genomic convergence has been observed in two independent  
647 evaluations of natural HP-LP populations (Fraser *et al.*, 2015; Whiting *et al.*, 2020), but  
648 appears to be more pervasive in experimental translocations of HP guppies to previously  
649 uncolonised LP habitats than naturally colonised LP populations (Fraser *et al.*, 2015). Part of  
650 this discrepancy can be explained by the concept of “adaptive architecture”, such that the  
651 convergent genetic basis of polygenic traits can be influenced by additional factors such as  
652 starting allele frequencies. Starting allele frequencies or amounts of standing variation are  
653 likely to be more similar when experimental populations are founded from the same  
654 population and/or lack founding bottlenecks compared with naturally-derived HP-LP pairs in  
655 different rivers. Empirical evidence for genetic convergence occurring with polygenic traits  
656 has been observed for male mating song traits in Hawaiian *Laupala* crickets (Blankers *et al.*,

## Genetic architecture of guppy life history

---

657 2019) and myxomatosis resistance in rabbits (Alves *et al.*, 2019), suggesting that genetic  
658 architecture alone is not necessarily a constraint on genetic convergence.  
659  
660 Similarly, polygenic traits are predicted to facilitate rapid adaptation. Several experimental  
661 studies involving the translocation of guppies into upstream LP habitats (Reznick and Bryga,  
662 1987; Reznick *et al.*, 1997, 2019; Gordon *et al.*, 2009) or manipulating predation within  
663 populations (Reznick *et al.*, 1990) have demonstrated that HP-LP adaptive traits evolve  
664 rapidly over the course of a few generations. Our findings here, that some of these traits  
665 exhibit genetic architectures of many loci of small effect, are in keeping with recent  
666 empirical (Barghi *et al.*, 2019) and theoretical work (Bell, 2013; Jain and Stephan, 2017a)  
667 suggesting these facilitate rapid adaptation. In this framework, many loci of small effect  
668 provide adaptive substrate within populations to rapidly respond to shifting optima. This is  
669 particularly true if distance to new fitness optima is short, such that environmental change  
670 is modest and fitness effects are relative and/or non-lethal. This may be the case for guppy  
671 life history traits under LP regimes, where soft selection is most likely. This model therefore  
672 could allow male life history traits to change rapidly through small changes at many loci,  
673 whilst additional segregating larger effect loci may act in concert with compensatory  
674 changes at small effect loci for female traits. Our results here provide regions of the genome  
675 and candidate genes to explore further. For instance, an appreciation that much of the  
676 genetic basis of guppy life history traits may be polygenic informs on experimental and  
677 sampling designs for future population genetic studies of this system. In particular, temporal  
678 sampling and quantifying genome-wide autocovariances of neutral allele frequencies offers  
679 a promising avenue for studying the role of polygenic architectures in rapid adaptation

## Genetic architecture of guppy life history

---

680 (Buffalo and Coop, 2019). The genomic regions identified here may serve as focal regions in  
681 these studies.

682

683 In conclusion, we used an F2 cross to explore the genetic architecture of seven guppy life  
684 history traits that are known to evolve rapidly and convergently in natural populations. We  
685 find evidence of only two loci of large effect associated with female size at first brood and  
686 offspring weight, and evidence of many loci of small effect associated with male age and  
687 size at maturity, interbrood period and brood size. In addition, we observed several within-  
688 family loci of large effect, suggesting segregating variation within source populations. These  
689 results have important implications for improving our understanding of how life history  
690 traits evolve in the guppy model, and more broadly, provide empirical evidence for  
691 predictions of the genetic architecture of rapidly adapting and convergent phenotypes.

692

### 693 **ACKNOWLEDGEMENTS**

694 The authors wish to thank all members of the Fraser group for useful discussions. Pasi  
695 Rastas provided advice for linkage mapping with Lep-MAP3. Simon Zhu, Blanca Guzman,  
696 Sara Ruckman, Ruchittrani Hapuarachchi, Christopher Tan, Kevin Khuu, Vicent Poon, Carol  
697 Villacana, and Brianna Paramo assisted in fish rearing and crossing at UC Riverside. HPC  
698 infrastructure support was provided by The University of Exeter's High Performance  
699 Computing (HPC) facility (ISCA). DNA sequencing was performed by University of Exeter  
700 Sequencing Service (ESS).

701

### 702 **FUNDING**



## Genetic architecture of guppy life history

---

703 JRW, PJP, and BAF are supported by an EU Research Council Grant (GuppyCON 758382), JRP  
704 is supported by a NERC grant (NE/P013074/1). This project utilised equipment funded by  
705 the Wellcome Trust Institutional Strategic Support Fund (WT097835MF), Wellcome Trust  
706 Multi User Equipment Award (WT101650MA) and BBSRC LOLA award (BB/K003240/1).

707

### 708 **DATA AVAILABILITY**

709 All sequencing read data is available from the ENA (DOI: XXX)

710 All scripts and other data associated with analysis will be made available in an archived

711 github repository (Zenodo, DOI: XXX)

712

### 713 **CONFLICTS OF INTEREST**

714 The authors declare no conflicts of interest.

715

### 716 **REFERENCES**

717 Alves JM, Carneiro M, Cheng JY, Lemos de Matos A, Rahman MM, Loog L, *et al.* (2019). Parallel  
718 adaptation of rabbit populations to myxoma virus. *Science* **363**: 1319–1326.

719 Ayllon F, Kjærner-Semb E, Furmanek T, Wennevik V, Solberg MF, Dahle G, *et al.* (2015). The vglI3  
720 Locus Controls Age at Maturity in Wild and Domesticated Atlantic Salmon (*Salmo salar* L.)  
721 Males. *PLoS Genet* **11**: e1005628.

722 Baird NA, Etter PD, Atwood TS, Currey MC, Shiver AL, Lewis ZA, *et al.* (2008). Rapid SNP discovery  
723 and genetic mapping using sequenced RAD markers. *PLoS One* **3**: e3376.

724 Barghi N, Hermisson J, Schlötterer C (2020). Polygenic adaptation: a unifying framework to  
725 understand positive selection. *Nat Rev Genet*.

726 Barghi N, Tobler R, Nolte V, Jakšić AM, Mallard F, Otte KA, *et al.* (2019). Genetic redundancy fuels  
727 polygenic adaptation in *Drosophila*. *PLoS Biol* **17**: e3000128.

728 Barson NJ, Aykanat T, Hindar K, Baranski M, Bolstad GH, Fiske P, *et al.* (2015). Sex-dependent  
729 dominance at a single locus maintains variation in age at maturity in salmon. *Nature* **528**: 405–  
730 408.

731 Barton NH, Etheridge AM, Véber A (2017). The infinitesimal model: Definition, derivation, and  
732 implications. *Theor Popul Biol* **118**: 50–73.

## Genetic architecture of guppy life history

---

- 733 Beavis WD (1994). The power and deceit of QTL experiments: lessons from comparative QTL studies.  
734 In: *Proceedings of the forty-ninth annual corn and sorghum industry research conference*,  
735 Chicago, IL, pp 250–266.
- 736 Bell G (2013). Evolutionary rescue and the limits of adaptation. *Philos Trans R Soc Lond B Biol Sci* **368**:  
737 20120080.
- 738 Bérénos C, Ellis PA, Pilkington JG, Lee SH, Gratten J, Pemberton JM (2015). Heterogeneity of genetic  
739 architecture of body size traits in a free-living population. *Mol Ecol* **24**: 1810–1830.
- 740 Bergero R, Gardner J, Bader B, Yong L, Charlesworth D (2019). Exaggerated heterochiasmy in a fish  
741 with sex-linked male coloration polymorphisms. *Proc Natl Acad Sci U S A* **116**: 6924–6931.
- 742 Blankers T, Oh KP, Shaw KL (2019). Parallel genomic architecture underlies repeated sexual signal  
743 divergence in Hawaiian *Laupala* crickets. *Proc Biol Sci* **286**: 20191479.
- 744 Broad Institute (2019). Picard Toolkit. *Broad Institute, GitHub repository*.
- 745 Broman KW, Gatti DM, Simecek P, Furlotte NA, Prins P, Sen Ś, *et al.* (2019). R/qtl2: Software for  
746 Mapping Quantitative Trait Loci with High-Dimensional Data and Multiparent Populations.  
747 *Genetics* **211**: 495–502.
- 748 Broman KW, Wu H, Sen Ś, Churchill GA (2003). R/qtl: QTL mapping in experimental crosses.  
749 *Bioinformatics* **19**: 889–890.
- 750 Buffalo V, Coop G (2019). The Linked Selection Signature of Rapid Adaptation in Temporal Genomic  
751 Data. *Genetics* **213**: 1007–1045.
- 752 Charlesworth D, Bergero R, Graham C, Gardner J, Yong L (2020). Locating the Sex Determining  
753 Region of Linkage Group 12 of Guppy (*Poecilia reticulata*). *G3* **10**: 3639–3649.
- 754 Charlesworth D, Zhang Y, Bergero R, Graham C, Gardner J, Yong L (2020). Using GC content to  
755 compare recombination patterns on the sex chromosomes and autosomes of the guppy,  
756 *Poecilia reticulata*, and its close outgroup species. *Mol Biol Evol*.
- 757 Colosimo PF (2005). Widespread Parallel Evolution in Sticklebacks by Repeated Fixation of  
758 Ectodysplasin Alleles. *Science* **307**: 1928–1933.
- 759 Dayan DI, Du X, Baris TZ, Wagner DN, Crawford DL, Oleksiak MF (2019). Population genomics of  
760 rapid evolution in natural populations: polygenic selection in response to power station thermal  
761 effluents. *BMC Evol Biol* **19**: 61.
- 762 Duntsch L, Tomotani BM, de Villemereuil P, Brekke P, Lee KD, Ewen JG, *et al.* (2020). Polygenic basis  
763 for adaptive morphological variation in a threatened Aotearoa | New Zealand bird, the hihi  
764 (*Notiomystis cincta*). *Proc Biol Sci* **287**: 20200948.
- 765 Endler JA (1980). Natural Selection on Color Patterns in *Poecilia reticulata*. *Evolution* **34**: 76–91.
- 766 Felmy A, Reznick DN, Travis J, Potter T, Coulson T (2021). Life histories as mosaics: plastic and genetic  
767 components differ among traits that underpin life-history strategies. *bioRxiv*:  
768 2021.02.12.430905.
- 769 Fisher RA (1918). The correlation between relatives under the supposition of Mendelian inheritance.  
770 *Trans R Soc Edinb* **52**: 399–433.

## Genetic architecture of guppy life history

---

- 771 Fisher RA (1930). *The genetical theory of natural selection*. Clarendon Press: Oxford, England.
- 772 Fraser BA, Künstner A, Reznick DN, Dreyer C, Weigel D (2015). Population genomics of natural and  
773 experimental populations of guppies (*Poecilia reticulata*). *Mol Ecol* **24**: 389–408.
- 774 Fraser BA, Whiting JR, Paris JR, Weadick CJ, Parsons PJ, Charlesworth D, *et al.* (2020). Improved  
775 reference genome uncovers novel sex-linked regions in the guppy (*Poecilia reticulata*). *Genome*  
776 *Biol Evol.*
- 777 Gordon SP, Reznick DN, Kinnison MT, Bryant MJ, Weese DJ, Räsänen K, *et al.* (2009). Adaptive  
778 Changes in Life History and Survival following a New Guppy Introduction. *Am Nat* **174**: 34–45.
- 779 Hall MC, Basten CJ, Willis JH (2006). Pleiotropic quantitative trait loci contribute to population  
780 divergence in traits associated with life-history variation in *Mimulus guttatus*. *Genetics* **172**:  
781 1829–1844.
- 782 Handelsman CA, Broder ED, Dalton CM, Ruell EW, Myrick CA, Reznick DN, *et al.* (2013). Predator-  
783 induced phenotypic plasticity in metabolism and rate of growth: rapid adaptation to a novel  
784 environment. *Integr Comp Biol* **53**: 975–988.
- 785 Hartig F (2020). DHARMA: Residual Diagnostics for Hierarchical (Multi-Level / Mixed) Regression  
786 Models.
- 787 Huang X, Jiang Y, Zhang W, Cheng Y, Wang Y, Ma X, *et al.* (2020). Construction of a high-density  
788 genetic map and mapping of growth related QTLs in the grass carp (*Ctenopharyngodon idellus*).  
789 *BMC Genomics* **21**: 313.
- 790 Jain K, Stephan W (2015). Response of Polygenic Traits Under Stabilizing Selection and Mutation  
791 When Loci Have Unequal Effects. *G3* **5**: 1065–1074.
- 792 Jain K, Stephan W (2017a). Rapid Adaptation of a Polygenic Trait After a Sudden Environmental Shift.  
793 *Genetics* **206**: 389–406.
- 794 Jain K, Stephan W (2017b). Modes of Rapid Polygenic Adaptation. *Mol Biol Evol* **34**: 3169–3175.
- 795 Kallman KD, Borkoski V (1978). A Sex-Linked Gene Controlling the Onset of Sexual Maturity in  
796 Female and Male Platyfish (*XIPHOPHORUS MACULATUS*), Fecundity in Females and Adult Size in  
797 Males. *Genetics* **89**: 79–119.
- 798 Kasowitz SD, Ma J, Anderson SJ, Leu NA, Xu Y, Gregory BD, *et al.* (2018). Nuclear m6A reader YTHDC1  
799 regulates alternative polyadenylation and splicing during mouse oocyte development. *PLoS*  
800 *Genet* **14**: e1007412.
- 801 Kempainen P, Husby A (2018a). Inference of genetic architecture from chromosome partitioning  
802 analyses is sensitive to genome variation, sample size, heritability and effect size distribution.  
803 *Mol Ecol Resour* **18**: 767–777.
- 804 Kempainen P, Husby A (2018b). Accounting for heteroscedasticity and censoring in chromosome  
805 partitioning analyses. *Evol Lett* **2**: 599–609.
- 806 Kodama M, Hard JJ, Naish KA (2018). Mapping of quantitative trait loci for temporal growth and age  
807 at maturity in coho salmon: Evidence for genotype-by-sex interactions. *Mar Genomics* **38**: 33–  
808 44.

## Genetic architecture of guppy life history

---

- 809 Künstner A, Hoffmann M, Fraser BA, Kottler VA, Sharma E, Weigel D, *et al.* (2016). The Genome of  
810 the Trinidadian Guppy, *Poecilia reticulata*, and Variation in the Guanapo Population. *PLoS One*:  
811 1–25.
- 812 Lampert KP, Schmidt C, Fischer P, Volff J-N, Hoffmann C, Muck J, *et al.* (2010). Determination of  
813 onset of sexual maturation and mating behavior by melanocortin receptor 4 polymorphisms.  
814 *Curr Biol* **20**: 1729–1734.
- 815 Láruson ÁJ, Yeaman S, Lotterhos KE (2020). The Importance of Genetic Redundancy in Evolution.  
816 *Trends Ecol Evol* **35**: 809–822.
- 817 Li H (2013). Aligning sequence reads, clone sequences and assembly contigs with BWA-MEM. *arXiv*  
818 [*q-bioGN*].
- 819 Manolio TA, Collins FS, Cox NJ, Goldstein DB, Hindorff LA, Hunter DJ, *et al.* (2009). Finding the  
820 missing heritability of complex diseases. *Nature* **461**: 747–753.
- 821 Martin M (2011). Cutadapt removes adapter sequences from high-throughput sequencing reads.  
822 *EMBnet.journal* **17**: 10–12.
- 823 Miller MR, Dunham JP, Amores A, Cresko WA, Johnson EA (2007). Rapid and cost-effective  
824 polymorphism identification and genotyping using restriction site associated DNA (RAD)  
825 markers. *Genome Res* **17**: 240–248.
- 826 Moghadam HK, Poissant J, Fotherby H, Haidle L, Ferguson MM, Danzmann RG (2007). Quantitative  
827 trait loci for body weight, condition factor and age at sexual maturation in Arctic charr  
828 (*Salvelinus alpinus*): comparative analysis with rainbow trout (*Oncorhynchus mykiss*) and  
829 Atlantic salmon (*Salmo salar*). *Mol Genet Genomics* **277**: 647–661.
- 830 Nicholls JA, Double MC, Rowell DM, Magrath RD (2000). The Evolution of Cooperative and Pair  
831 Breeding in Thornbills *Acanthiza* (*Pardalotidae*). *J Avian Biol* **31**: 165–176.
- 832 Poland JA, Brown PJ, Sorrells ME, Jannink J-L (2012). Development of high-density genetic maps for  
833 barley and wheat using a novel two-enzyme genotyping-by-sequencing approach. *PLoS One* **7**:  
834 e32253.
- 835 Pritchard JK, Pickrell JK, Coop G (2010). The genetics of human adaptation: hard sweeps, soft  
836 sweeps, and polygenic adaptation. *Curr Biol* **20**: R208–15.
- 837 Rastas P (2017). Lep-MAP3: robust linkage mapping even for low-coverage whole genome  
838 sequencing data. *Bioinformatics* **33**: 3726–3732.
- 839 R Core Team (2020). R: A Language and Environment for Statistical Computing.
- 840 Reed RD, Papa R, Martin A, Hines HM, Counterman BA, Pardo-Diaz C, *et al.* (2011). optix drives the  
841 repeated convergent evolution of butterfly wing pattern mimicry. *Science* **333**: 1137–1141.
- 842 Reznick D (1982). The impact of predation on life history evolution in Trinidadian guppies: genetic  
843 basis of observed life history patterns. *Evolution* **36**: 1236–1250.
- 844 Reznick DN, Bassar RD, Handelsman CA, Ghalambor CK, Arendt J, Coulson T, *et al.* (2019). Eco-  
845 evolutionary feedbacks predict the time course of rapid life history evolution. *Am Nat* **194**:  
846 705380.

## Genetic architecture of guppy life history

---

- 847 Reznick D, Bryant M, Holmes D (2005). The Evolution of Senescence and Post-Reproductive Lifespan  
848 in Guppies (*Poecilia reticulata*). *PLoS Biol* **4**: e7.
- 849 Reznick DN, Bryant MJ, Roff D, Ghalambor CK, Ghalambor DE (2004). Effect of extrinsic mortality on  
850 the evolution of senescence in guppies. *Nature* **431**: 1095–1099.
- 851 Reznick DN, Bryga H (1987). Life-history evolution in guppies (*Poecilia reticulata*): 1. Phenotypic and  
852 genetic changes in an introduction experiment. *Evolution* **41**: 1370–1385.
- 853 Reznick DA, Bryga H, Endler JA (1990). Experimentally induced life-history evolution in a natural  
854 population. *Nature* **346**: 357–359.
- 855 Reznick D, Butler MJ Iv, Rodd H (2001). Life-history evolution in guppies. VII. The comparative  
856 ecology of high- and low-predation environments. *Am Nat* **157**: 126–140.
- 857 Reznick DN, Rodd FH, Cardenas M (1996). Life-History Evolution in Guppies (*Poecilia reticulata*:  
858 *Poeciliidae*). IV. Parallelism in Life-History Phenotypes. *Am Nat* **147**: 319–338.
- 859 Reznick DN, Shaw FH, Rodd FH, Shaw RG (1997). Evaluation of the Rate of Evolution in Natural  
860 Populations of Guppies. *Science* **275**: 1934–1937.
- 861 Reznick D, Yang AP (1993). The Influence of Fluctuating Resources on Life History: Patterns of  
862 Allocation and Plasticity in Female Guppies. *Ecology* **74**: 2011–2019.
- 863 Richardson DS, Jury FL, Blaakmeer K, Komdeur J, Burke T (2001). Parentage assignment and extra-  
864 group paternity in a cooperative breeder: the Seychelles warbler (*Acrocephalus sechellensis*).  
865 *Mol Ecol* **10**: 2263–2273.
- 866 Rochette NC, Rivera-Colón AG, Catchen JM (2019). Stacks 2: Analytical methods for paired-end  
867 sequencing improve RADseq-based population genomics. *Mol Ecol* **28**: 4737–4754.
- 868 Rockman MV (2012). The QTN program and the alleles that matter for evolution: all that’s gold does  
869 not glitter. *Evolution* **66**: 1–17.
- 870 Santure AW, De Cauwer I, Robinson MR, Poissant J, Sheldon BC, Slate J (2013). Genomic dissection of  
871 variation in clutch size and egg mass in a wild great tit (*Parus major*) population. *Mol Ecol* **22**:  
872 3949–3962.
- 873 Santure AW, Poissant J, De Cauwer I, van Oers K, Robinson MR, Quinn JL, *et al.* (2015). Replicated  
874 analysis of the genetic architecture of quantitative traits in two wild great tit populations. *Mol*  
875 *Ecol* **24**: 6148–6162.
- 876 Sharma E, Künstner A, Fraser BA, Zipprich G, Kottler VA, Henz SR, *et al.* (2014). Transcriptome  
877 assemblies for studying sex-biased gene expression in the guppy, *Poecilia reticulata*. *BMC*  
878 *Genomics* **15**: 400.
- 879 Slate J (2013). From beavis to beak color: a simulation study to examine how much qtl mapping can  
880 reveal about the genetic architecture of quantitative traits. *Evolution* **67**: 1251–1262.
- 881 Stanton-Geddes J, Yoder JB, Briskine R, Young ND, Tiffin P (2013). Estimating heritability using  
882 genomic data (J Hadfield, Ed.). *Methods Ecol Evol* **4**: 1151–1158.
- 883 Stern DL (2013). The genetic causes of convergent evolution. *Nat Rev Genet* **14**: 751–764.
- 884 Torres-Dowdall J, Handelsman CA, Reznick DN, Ghalambor CK (2012). Local adaptation and the

## Genetic architecture of guppy life history

---

- 885 evolution of phenotypic plasticity in Trinidadian guppies (*Poecilia reticulata*). *Evolution* **66**:  
886 3432–3443.
- 887 Torres Dowdall J, Handelsman CA, Ruell EW, Auer SK, Reznick DN, Ghalambor CK (2012). Fine-scale  
888 local adaptation in life histories along a continuous environmental gradient in Trinidadian  
889 guppies: Fine-scale local adaptation in guppies. *Funct Ecol* **26**: 616–627.
- 890 Wang X, Zhao BS, Roundtree IA, Lu Z, Han D, Ma H, *et al.* (2015). N(6)-methyladenosine Modulates  
891 Messenger RNA Translation Efficiency. *Cell* **161**: 1388–1399.
- 892 Westram AM, Rafajlović M, Chaube P, Faria R, Larsson T, Panova M, *et al.* (2018). Clines on the  
893 seashore: The genomic architecture underlying rapid divergence in the face of gene flow. *Evol*  
894 *Lett* **2**: 297–309.
- 895 Whitehead A, Clark BW, Reid NM, Hahn ME, Nacci D (2017). When evolution is the solution to  
896 pollution: Key principles, and lessons from rapid repeated adaptation of killifish (*Fundulus*  
897 *heteroclitus*) populations. *Evol Appl* **10**: 762–783.
- 898 Whiting JR, Paris JR, van der Zee MJ, Parsons PJ, Weigel D, Fraser BA (2020). Drainage-structuring of  
899 ancestral variation and a common functional pathway shape limited genomic convergence in  
900 natural high- and low-predation guppies. *bioRxiv*: 2020.10.14.339333.
- 901 Xia H, Zhong C, Wu X, Chen J, Tao B, Xia X, *et al.* (2018). Mettl3 Mutation Disrupts Gamete  
902 Maturation and Reduces Fertility in Zebrafish. *Genetics* **208**: 729–743.
- 903 Yang J, Benyamin B, McEvoy BP, Gordon S, Henders AK, Nyholt DR, *et al.* (2010). Common SNPs  
904 explain a large proportion of the heritability for human height. *Nat Genet* **42**: 565–569.
- 905 Yang J, Lee SH, Goddard ME, Visscher PM (2011). GCTA: a tool for genome-wide complex trait  
906 analysis. *Am J Hum Genet* **88**: 76–82.
- 907 Yang J, Manolio TA, Pasquale LR, Boerwinkle E, Caporaso N, Cunningham JM, *et al.* (2011). Genome  
908 partitioning of genetic variation for complex traits using common SNPs. *Nat Genet* **43**: 519–525.
- 909 Yeaman S, Gerstein AC, Hodgins KA, Whitlock MC (2018). Quantifying how constraints limit the  
910 diversity of viable routes to adaptation. *PLoS Genet* **14**: e1007717.
- 911 Zhang D (2020). rsq: R-Squared and Related Measures.
- 912
